# Supplementary material for: Activating the lattice oxygen oxidation mechanism in amorphous molybdenum cobalt oxide nanosheets for water oxidation
Source: Royal Society of Chemistry journal article supplement (doi:10.1039/d1ta09657e), 2022-01-01
Supplement: d1ta09657e1.pdf [file d1ta09657e1.pdf]

## ***Supporting Information***

### **Activating the lattice oxygen oxidation mechanism in amorphous molybdenum cobalt oxide nanosheets for water oxidation**

*Xiang Wang,<sup>ab</sup> Congcong Xing,<sup>ac</sup> Zhifu Liang,<sup>ad</sup> Pablo Guardia,<sup>a</sup> Xu Han,<sup>d</sup> Yong Zuo,<sup>ae</sup> Jordi Llorca,<sup>c</sup> Jordi Arbiol,<sup>df</sup> Junshan Li<sup>g</sup>, Andreu Cabot<sup>\*af</sup>*

<sup>a</sup> Catalonia Energy Research Institute - IREC, Sant Adria de Besòs, 08930 Barcelona, Spain.

<sup>b</sup> Department of Electronic and Biomedical Engineering, Universitat de Barcelona, 08028 Barcelona, Spain

<sup>c</sup> Institute of Energy Technologies, Department of Chemical Engineering and Barcelona, Research Center in Multiscale Science and Engineering, Universitat Politècnica de Catalunya, EEBE, 08019 Barcelona, Spain

<sup>d</sup> Catalan Institute of Nanoscience and Nanotechnology (ICN2), CSIC and BIST, Campus UAB, Bellaterra, 08193 Catalonia, Spain

<sup>e</sup> Istituto Italiano di Tecnologia, Via Morego 30, Genova, 16163 Italy

<sup>f</sup> ICREA, ICREA, 08010 Barcelona, Catalonia, Spain;

<sup>g</sup> Institute of Advanced Study, Chengdu University, Chengdu 610106, China

\*Email: [acabot@irec.cat](mailto:acabot@irec.cat)

\*Email: [lijunshan@cdu.edu.cn](mailto:lijunshan@cdu.edu.cn)

## Experimental Section

### Chemicals

Ammonium molybdate tetrahydrate ( $(\text{NH}_4)_6\text{Mo}_7\text{O}_{24}\cdot 4\text{H}_2\text{O}$ , 90%), cobalt nitrate hexahydrate ( $\text{Co}(\text{NO}_3)_2\cdot 6\text{H}_2\text{O}$ , 99.9%), potassium hydroxide (KOH, 85%), iridium(IV) oxide ( $\text{IrO}_2$ , 99.9% metal basis), and Nafion (5 wt% in a mixture of low aliphatic alcohols and water) were obtained from Sigma-Aldrich. 2-Methylimidazole ( $\text{C}_4\text{H}_6\text{N}_2$ , 99%) was purchased from Acros Organics. Methanol, ethanol and isopropanol were of analytical grade and obtained from various sources. Milli-Q water was obtained from a Purelab flex from Elga. All chemicals were used as received, without further purification.

### Synthesis of zeolitic imidazolate framework (ZIF-67)

ZIF-67 was produced following a modified version of a previously reported procedure.<sup>1</sup> Typically, 0.87 g  $\text{Co}(\text{NO}_3)_2\cdot 6\text{H}_2\text{O}$  was dissolved in 30 mL methanol to obtain a clear solution. Subsequently, the solution was poured into 30 mL methanol containing 1.97 g 2-methylimidazole under vigorous stirring. After mixing completely, the solution was incubated for 24 h at room temperature. Purple precipitates were collected by centrifugation, washed with methanol at least three times, and finally dried at 60 °C overnight.

### Synthesis of Mo-Co MOFs

120 mg of as-prepared ZIF-67 powder was ultrasonically dispersed in 20 mL ethanol. The dispersion was poured into a 100 mL aqueous solution containing 50 mg, 100 mg or 200 mg of  $(\text{NH}_4)_6\text{Mo}_7\text{O}_{24}\cdot 4\text{H}_2\text{O}$  under magnetic stirring. The mixture was then stirred vigorously for 12 hours at room temperature. Lavender-colored precipitates were collected by centrifugation, washed with water at least three times, and finally freeze-dried overnight. The obtained products were labelled as Mo-Co MOF-50, Mo-Co MOF-100 and Mo-Co MOF-200. The effect of stirring time was analyzed by preparing Mo-Co MOF-100 with different stirring times: 1 h, 3 h and 12 h. The effect of the Mo precursor was analyzed by replacing  $(\text{NH}_4)_6\text{Mo}_7\text{O}_{24}\cdot 4\text{H}_2\text{O}$  with the equivalent molybdenum molar amount of  $\text{Na}_2\text{MoO}_4\cdot 2\text{H}_2\text{O}$ , to obtain a sample labelled as  $\text{Na}_2\text{MoO}_4$ -ZIF-67.

### Synthesis of $\text{Co}_3\text{O}_4$ nanocrystals and amorphous $\text{MoCo}_x\text{O}_y$ nanosheets

ZIF-67 and Mo-Co MOF powders were annealed in a muffle furnace at 350 °C for 2 h with a

heating rate of 3 °C min<sup>-1</sup> under an air atmosphere. Black products were collected after natural cooling to ambient temperature and labelled as Co<sub>3</sub>O<sub>4</sub> and MoCo<sub>x</sub>O<sub>y</sub>-50, MoCo<sub>x</sub>O<sub>y</sub>-100, MoCo<sub>x</sub>O<sub>y</sub>-200, and Na<sub>2</sub>MoO<sub>4</sub>-MoCo<sub>x</sub>O<sub>y</sub>, depending on the MOF precursor powder used. To explore the effect of the annealing temperature, the Mo-Co MOFs-100 was also annealed at 450 °C and 550 °C for 2 h. Table S1 lists all the samples produced and tested in this study.

### **Material Characterizations and Electrocatalytic Evaluation**

Powder X-ray diffraction (XRD) patterns were obtained on a Bruker AXS D8 Advance X-ray diffractometer with Ni-filtered (2 µm thickness) Cu-Kα radiation ( $\lambda = 1.5406 \text{ \AA}$ ) operating at 40 mA and 40 kV. Scanning electron microscopy (SEM) analysis was conducted with a Zeiss Auriga microscope (Carl Zeiss, Jena, Germany) equipped with an energy-dispersive X-ray spectroscopy (EDS) detector operating at 20 kV. Transmission electron microscopy (TEM) analysis was carried out using a field emission gun FEI™ Tecnai F20 microscope at 200 kV with a point-to-point resolution of 0.19 nm. Atomic force microscopy (AFM) measurements were conducted using an AFM Multimode 8 system attached to a Nanoscope V electronic unit (Bruker). Raman spectroscopy was carried out on a confocal Raman spectrometer (Renishaw in Via Qontor) equipped with a Leica DM2700M microscope over the range of 50 to 1200 cm<sup>-1</sup>. A power of the laser of 1 mW cm<sup>-2</sup> was kept at all samples. X-ray photoelectron spectroscopy (XPS) analysis was carried out on a Specs system (Specs GmbH, Berlin, Germany) equipped with an Al anode XR50 source operating at 150 W and a Phoibos 150 MCD-9 detector. The pressure in the analysis chamber was kept below 10<sup>-7</sup> Pa. Thermogravimetric analyses (TGA) were carried out in air atmosphere from 50 to 700 °C with a ramp of 5 °C min<sup>-1</sup> using a Diamond TG/DTA Instruments (PerkinElmer, Waltham, MA). EPR spectroscopy was conducted on a Bruker EMXplus instrument (Bruker, Germany) with a microwave frequency of 9.40 GHz at 100 K.

All electrochemical measurements were performed at room temperature on a CHI760E electrochemical workstation (Shanghai Chenhua Instrument Co. Ltd., China) using a standard three-electrode cell. A graphite rod was used as the counter electrode and Hg/HgO (1.0 M KOH) as the reference electrode. Linear sweep voltammetry (LSV) was conducted at a scan rate of 5 mV s<sup>-1</sup> from 0 to 1.0 V in O<sub>2</sub>-saturated 1.0 M KOH electrolyte. All the presented data were corrected with 90% iR-compensation. Electrochemical impedance spectroscopy (EIS) analysis

was carried out in a frequency range from 100 kHz to 0.01 Hz at 5 mV and recorded at 1.55 V. The electrochemical double-layer capacitance ( $C_{dl}$ ) curves were obtained by cyclic voltammetry (CV) in a non-Faradaic region (0.90–1.00 V vs. RHE) at scan rates in the range 20 to 200  $\text{mV s}^{-1}$ . The long-term durability was tested using chronoamperometry at a constant current density of 10  $\text{mA cm}^{-2}$  for 60 h without iR compensation, and by comparing the LSVs curves (1.2 to 1.7 V) before and after 2000 CV cycles at a scan rate of 0.2  $\text{V s}^{-1}$ . In-situ Raman spectra were collected after different CV cycles in the range 1.3 V to 1.7 V at a scan rate of 0.01  $\text{V s}^{-1}$  on an Xplora Plus Raman microscope (Horiba, France) with a 532 nm excitation wavelength.

**Table S1.** Complete list of samples produced and characterized, including name, precursors and processing conditions.

| Sample name                                           | MOF    | Mo precursor                                                        | Mo precursor amount (mg) | Stirring time (h) | Annealing temperature (°C) |
|-------------------------------------------------------|--------|---------------------------------------------------------------------|--------------------------|-------------------|----------------------------|
| ZIF-67                                                | ZIF-67 | -                                                                   | -                        | -                 | -                          |
| Mo-Co MOF-50                                          | ZIF-67 | $(\text{NH}_4)_6\text{Mo}_7\text{O}_{24} \cdot 4\text{H}_2\text{O}$ | 50                       | 12                | -                          |
| Mo-Co MOF-100                                         | ZIF-67 | $(\text{NH}_4)_6\text{Mo}_7\text{O}_{24} \cdot 4\text{H}_2\text{O}$ | 100                      | 12                | -                          |
| Mo-Co MOF-100-1h                                      | ZIF-67 | $(\text{NH}_4)_6\text{Mo}_7\text{O}_{24} \cdot 4\text{H}_2\text{O}$ | 100                      | 1                 | -                          |
| Mo-Co MOF-100-3h                                      | ZIF-67 | $(\text{NH}_4)_6\text{Mo}_7\text{O}_{24} \cdot 4\text{H}_2\text{O}$ | 100                      | 3                 | -                          |
| Mo-Co MOF-200                                         | ZIF-67 | $(\text{NH}_4)_6\text{Mo}_7\text{O}_{24} \cdot 4\text{H}_2\text{O}$ | 200                      | 12                | -                          |
| $\text{Na}_2\text{MoO}_4$ -ZIF-67                     | ZIF-67 | $\text{Na}_2\text{MoO}_4 \cdot 2\text{H}_2\text{O}$                 | 140                      | 12                | -                          |
| $\text{Co}_3\text{O}_4$                               | ZIF-67 | -                                                                   | -                        | -                 | 350                        |
| $\text{MoCo}_x\text{O}_y$ -50                         | ZIF-67 | $(\text{NH}_4)_6\text{Mo}_7\text{O}_{24} \cdot 4\text{H}_2\text{O}$ | 50                       | 12                | 350                        |
| $\text{MoCo}_x\text{O}_y$ -100                        | ZIF-67 | $(\text{NH}_4)_6\text{Mo}_7\text{O}_{24} \cdot 4\text{H}_2\text{O}$ | 100                      | 12                | 350                        |
| $\text{MoCo}_x\text{O}_y$ -100-450°C                  | ZIF-67 | $(\text{NH}_4)_6\text{Mo}_7\text{O}_{24} \cdot 4\text{H}_2\text{O}$ | 100                      | 12                | 450                        |
| $\text{MoCo}_x\text{O}_y$ -100-550°C                  | ZIF-67 | $(\text{NH}_4)_6\text{Mo}_7\text{O}_{24} \cdot 4\text{H}_2\text{O}$ | 100                      | 12                | 550                        |
| $\text{MoCo}_x\text{O}_y$ -100-1h                     | ZIF-67 | $(\text{NH}_4)_6\text{Mo}_7\text{O}_{24} \cdot 4\text{H}_2\text{O}$ | 100                      | 1                 | 350                        |
| $\text{MoCo}_x\text{O}_y$ -100-3h                     | ZIF-67 | $(\text{NH}_4)_6\text{Mo}_7\text{O}_{24} \cdot 4\text{H}_2\text{O}$ | 100                      | 3                 | 350                        |
| $\text{MoCo}_x\text{O}_y$ -200                        | ZIF-67 | $(\text{NH}_4)_6\text{Mo}_7\text{O}_{24} \cdot 4\text{H}_2\text{O}$ | 200                      | 12                | 350                        |
| $\text{Na}_2\text{MoO}_4$ - $\text{MoCo}_x\text{O}_y$ | ZIF-67 | $\text{Na}_2\text{MoO}_4 \cdot 2\text{H}_2\text{O}$                 | 140                      | 12                | 350                        |

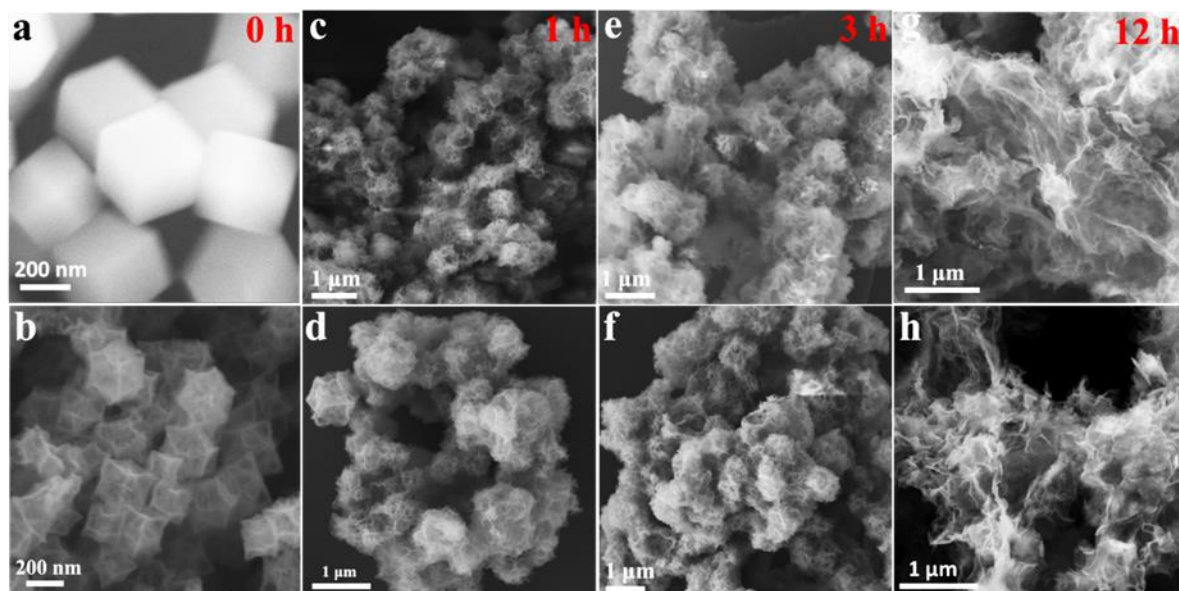

**Figure S1.** SEM images of a) ZIF-67, b)  $\text{Co}_3\text{O}_4$ , c) Mo-Co MOFs-1h, d)  $\text{MoCo}_x\text{O}_y$ -100-1h, e) Mo-Co MOFs-3h, f)  $\text{MoCo}_x\text{O}_y$ -100-3h, g) Mo-Co MOFs-12h, and h)  $\text{MoCo}_x\text{O}_y$ -100-12h.

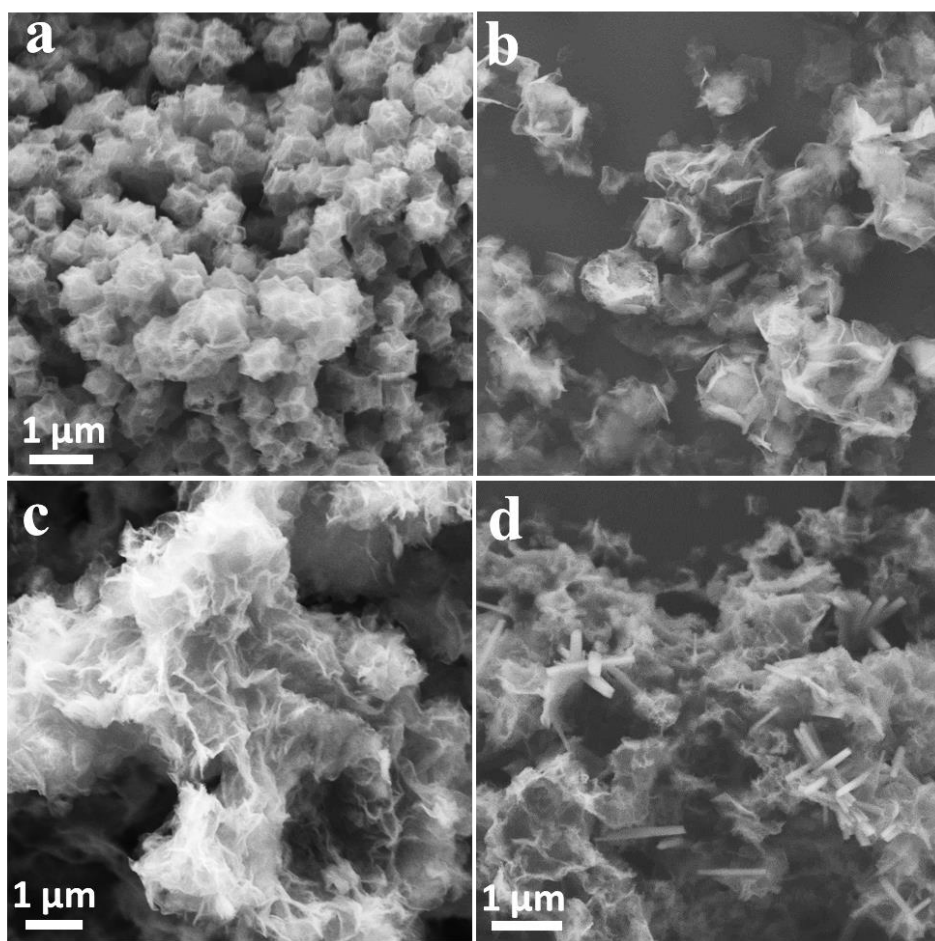

**Figure S2.** SEM images of a)  $\text{Co}_3\text{O}_4$ , b)  $\text{MoCo}_x\text{O}_y$ -50, c)  $\text{MoCo}_x\text{O}_y$ -100 and d)  $\text{MoCo}_x\text{O}_y$ -200.

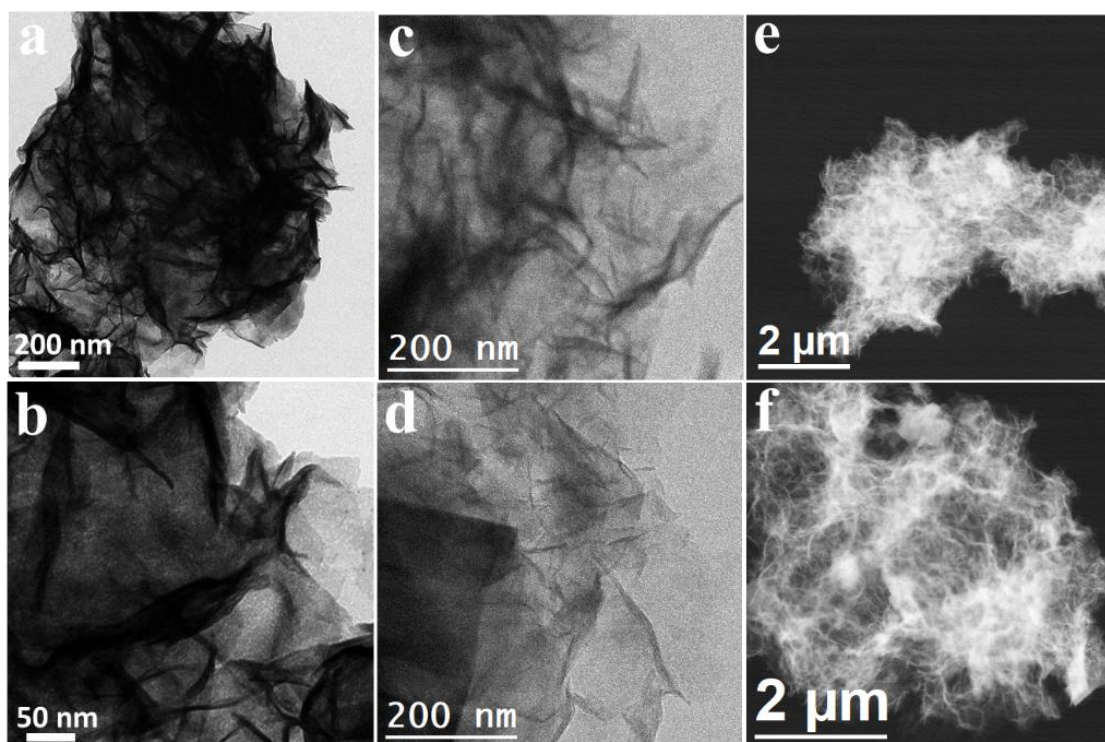

**Figure S3.** (a-d) TEM and (e-f) HAADF STEM images of  $\text{MoCo}_x\text{O}_y\text{-100}$ .

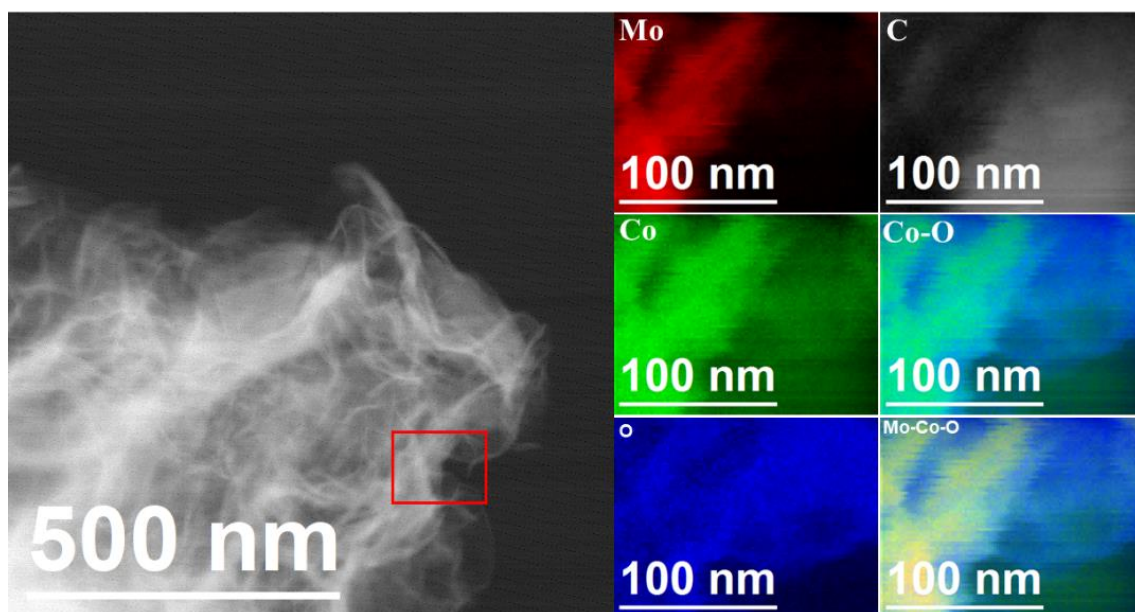

**Figure. S4.** EELS chemical composition maps obtained from the red squared area of the STEM micrograph of MoCo<sub>x</sub>O<sub>y</sub>-100. Individual Mo M<sub>4,5</sub>-edges at 227 eV (red), Co L<sub>2,3</sub>-edges at 779 eV (green), O K-edge at 532 eV and C K-edge at 284 eV (grey) and composites of Co-O and Mo-Co-O.



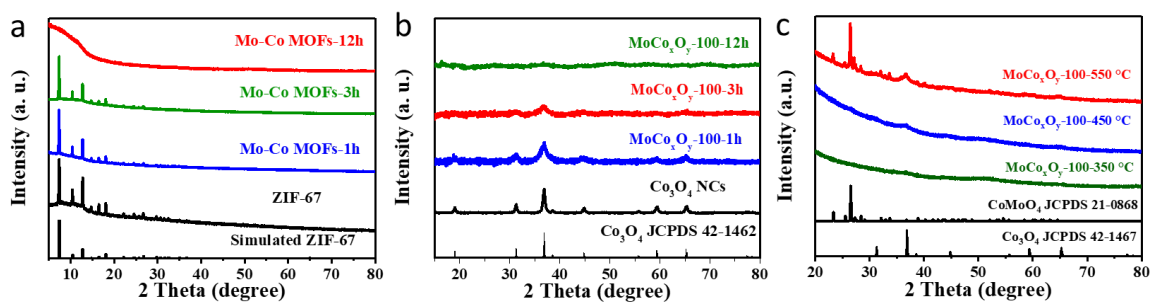

**Figure S5.** XRD patterns of a) Mo-Co MOFs produced using different stirring times, b)  $\text{MoCo}_x\text{O}_y$ -100 samples obtained from the annealing of Mo-Co MOFs produced with different stirring times and c)  $\text{MoCo}_x\text{O}_y$ -100 after different annealing temperature.

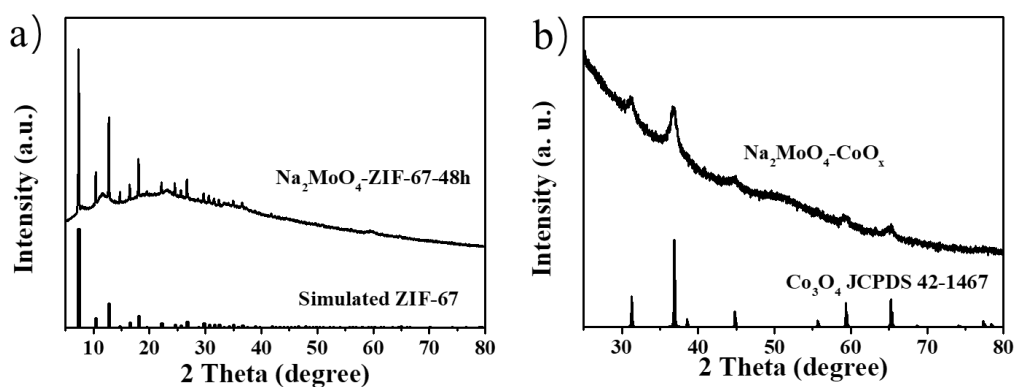

**Figure S6.** XRD patterns of a)  $\text{Na}_2\text{MoO}_4$ -ZIF-67 and b)  $\text{Na}_2\text{MoO}_4$ - $\text{CoO}_x$  after 350 °C calcination.

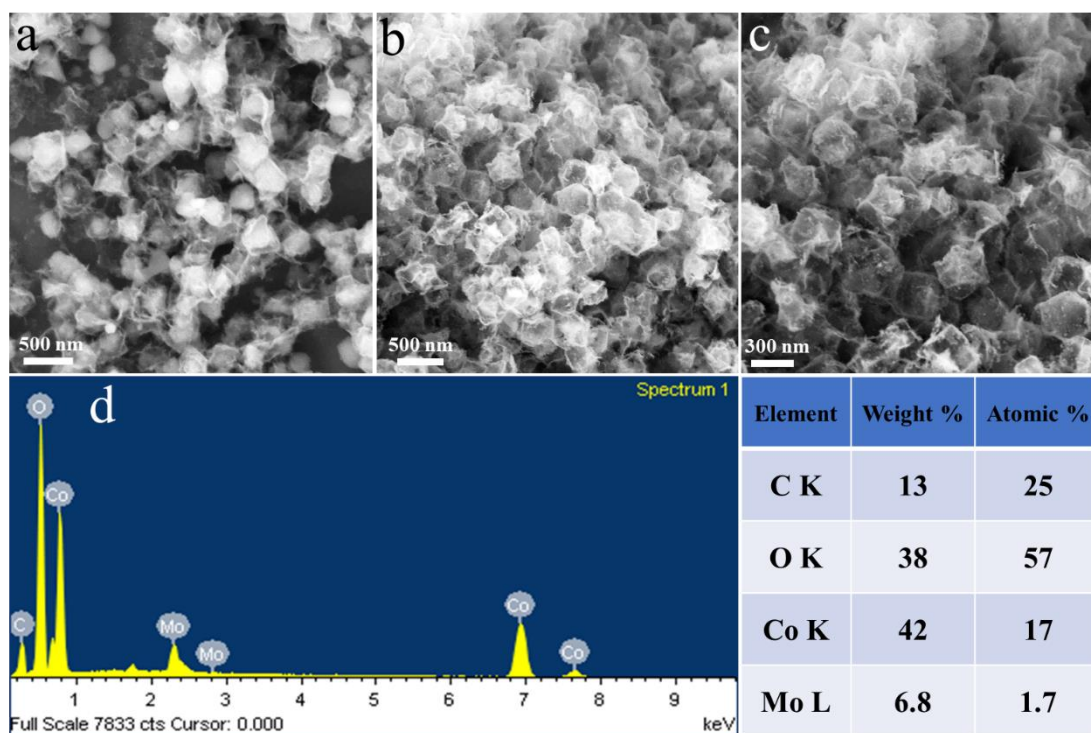

**Figure S7.** a) SEM images of Na<sub>2</sub>MoO<sub>4</sub>-ZIF-67. b-c) SEM images and d) EDX spectrum of Na<sub>2</sub>MoO<sub>4</sub>-CoO<sub>x</sub> after 350 °C calcination.

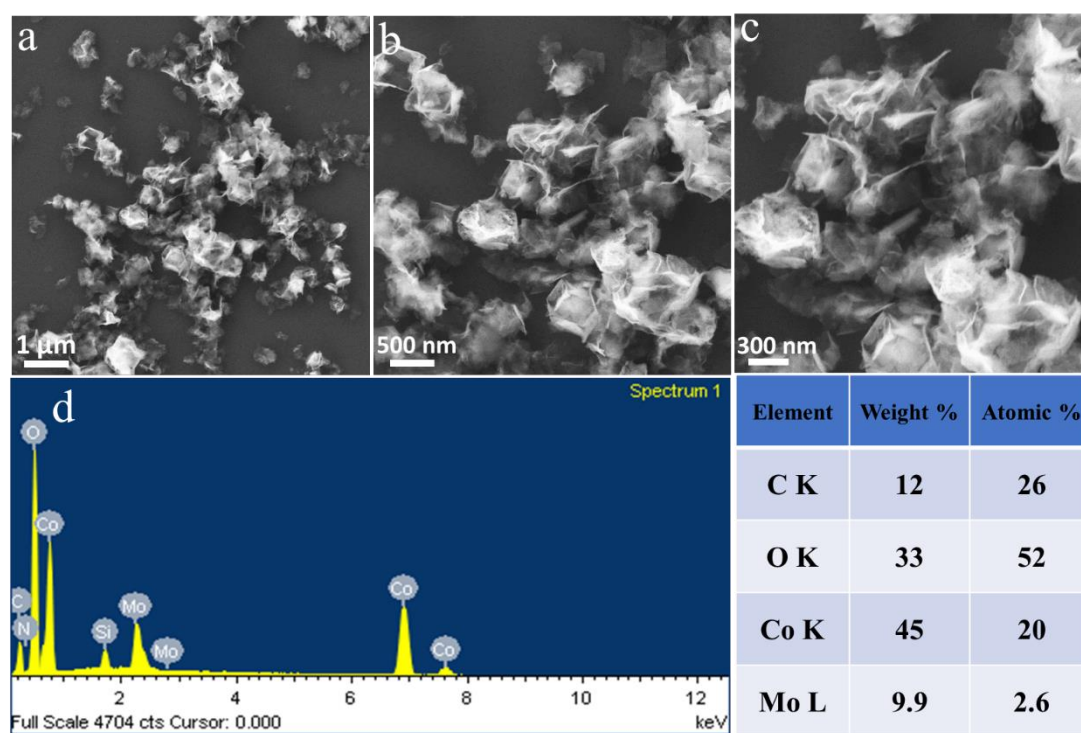

**Figure S8.** a-c) SEM images and b) EDX spectrum of MoCo<sub>x</sub>O<sub>y</sub>-50 after 350 °C calcination

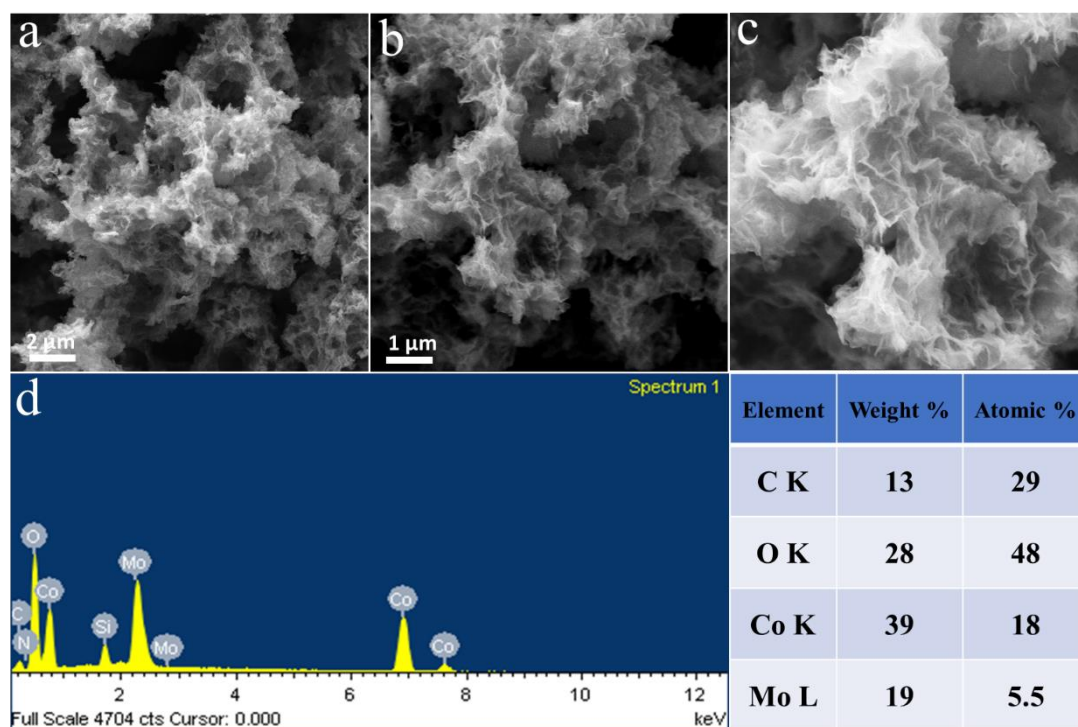

**Figure S9.** a-c) SEM images and d) EDX spectrum of  $\text{MoCo}_x\text{O}_y\text{-100}$  after 350 °C calcination

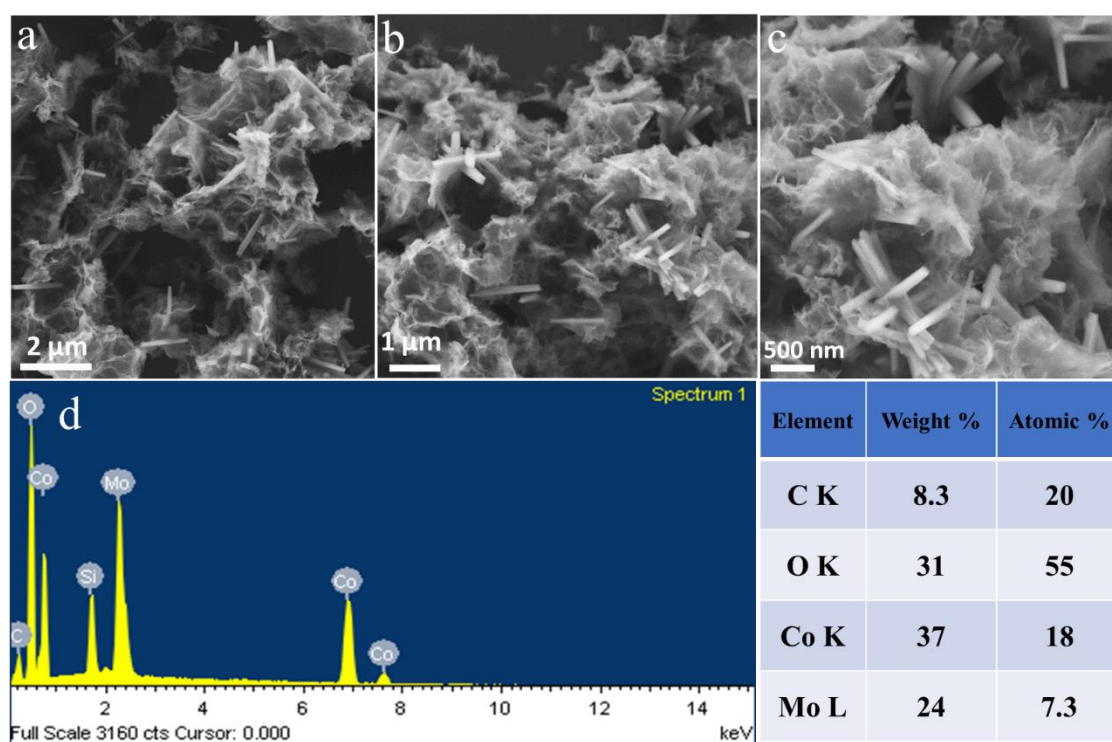

**Figure S10.** a-c) SEM images and d) EDX spectrum of  $\text{MoCo}_x\text{O}_y\text{-200}$  after 350 °C calcination

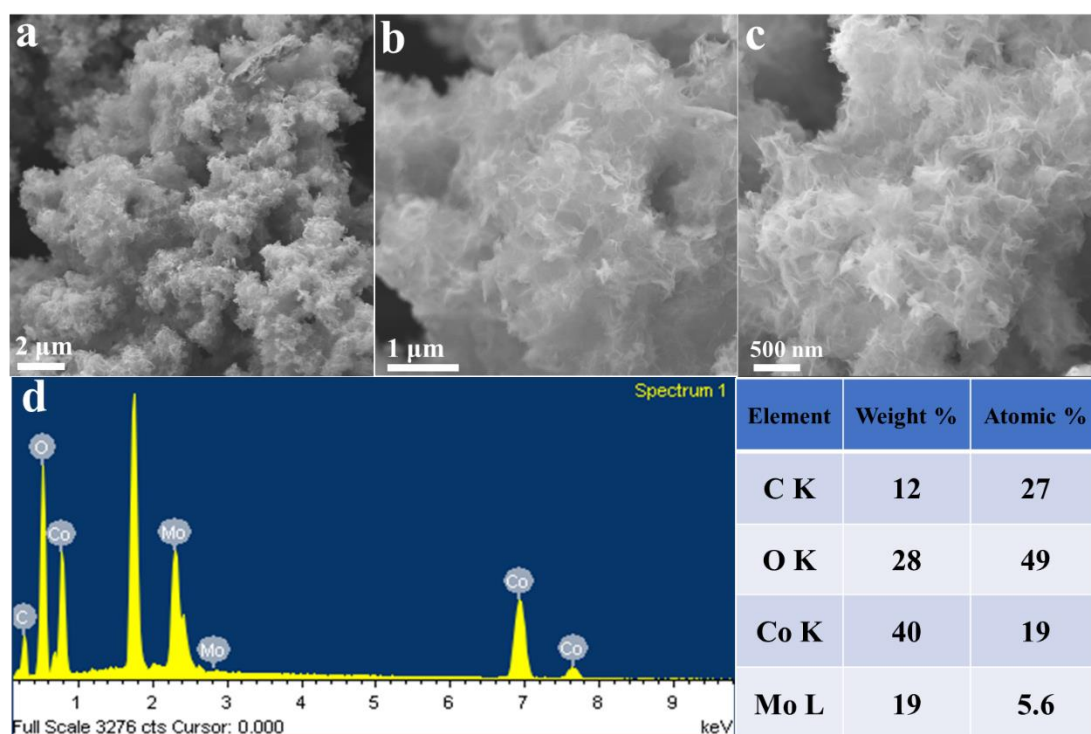

**Figure S11.** a-c) SEM images and d) EDX spectrum of MoCo<sub>x</sub>O<sub>y</sub>-100 after 450 °C calcination

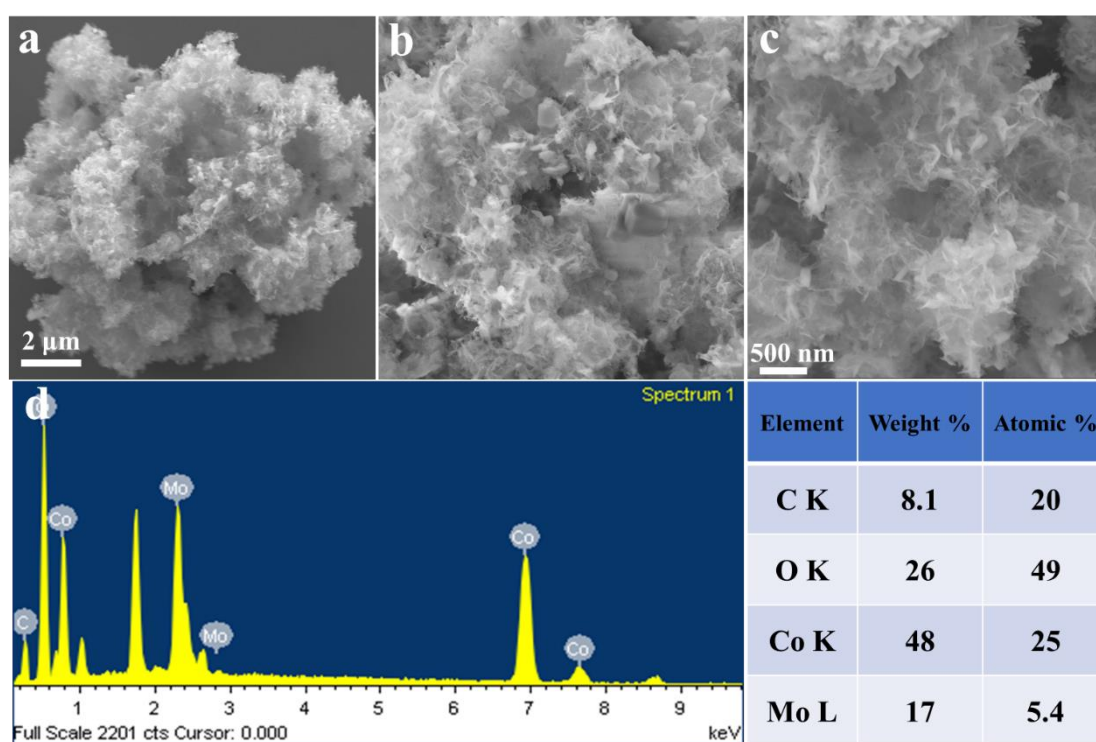

**Figure S12.** a-c) SEM images and d) EDX spectrum of MoCo<sub>x</sub>O<sub>y</sub>-100 after 550 °C calcination



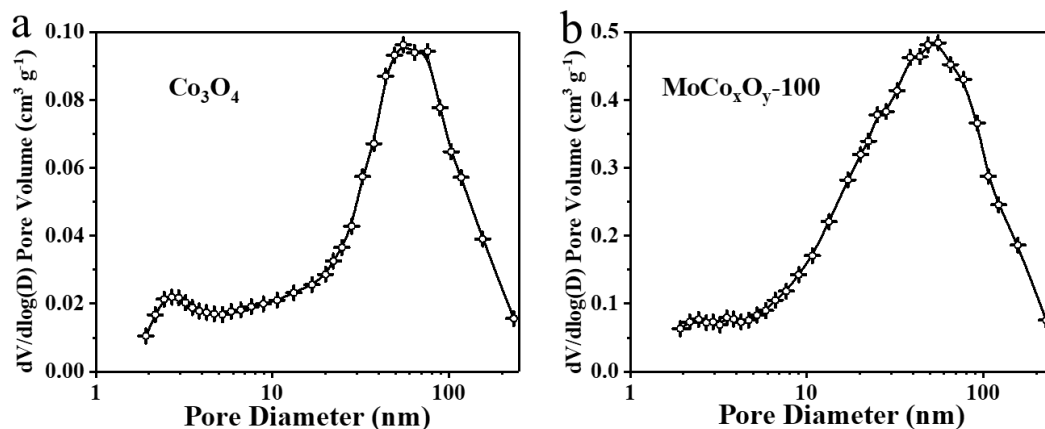

**Figure S13.** Pore size distribution for a)  $\text{Co}_3\text{O}_4$  and b)  $\text{MoCo}_x\text{O}_y-100$

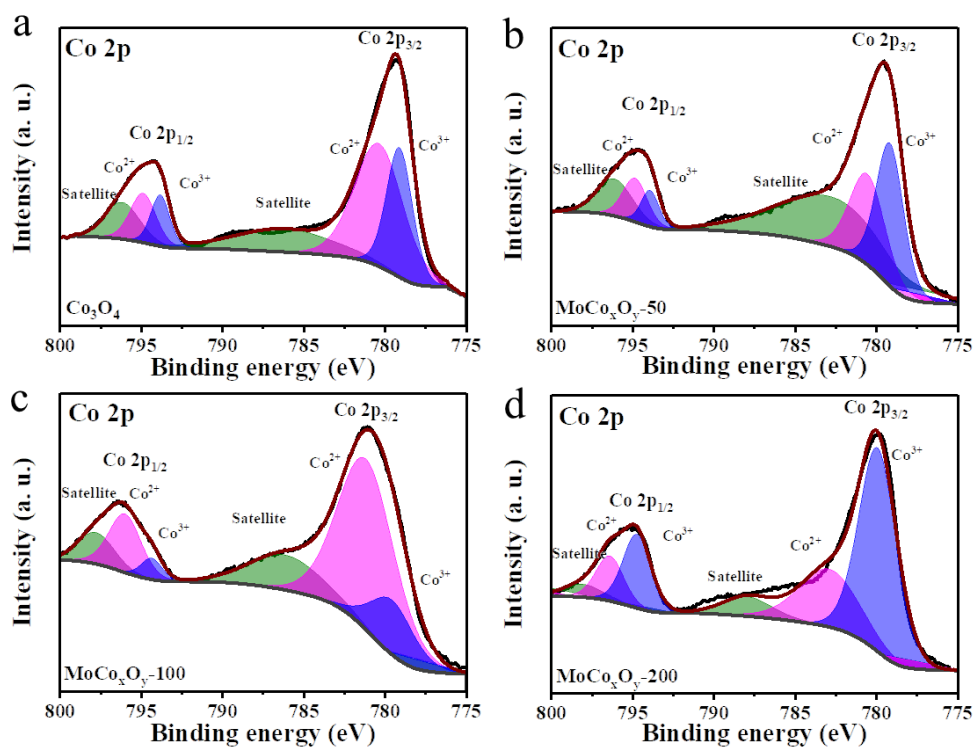

**Figure S14.** a-d) Co 2p high-resolution XPS spectra of  $\text{Co}_3\text{O}_4$  and  $\text{MoCo}_x\text{O}_y$  with different molybdenum contents.

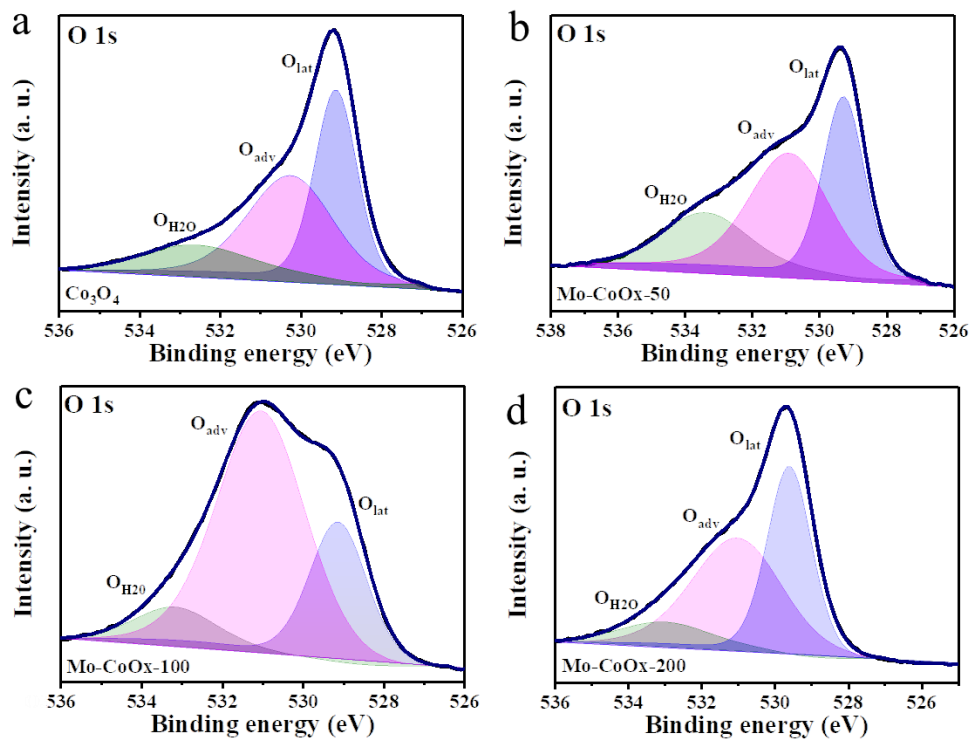

**Figure S15.** a-d) O 1s high-resolution XPS spectra of  $\text{Co}_3\text{O}_4$  and  $\text{MoCo}_x\text{O}_y$  with different molybdenum contents.

**Table S2.** Surface ratios of Co and Mo chemical states, ratio of adsorbed vs. lattice oxygen, and Mo/Co ratio as obtained from the XPS analysis.

| Samples                                                | $\text{Co}^{2+}/\text{Co}^{3+}$ | $\text{Mo}^{4+}/\text{Mo}^{6+}$ | $\text{O}_{\text{ads}}/\text{O}_{\text{lat}}$ | Mo/Co |
|--------------------------------------------------------|---------------------------------|---------------------------------|-----------------------------------------------|-------|
| <b><math>\text{Co}_3\text{O}_4</math></b>              | 3.06                            | -                               | 0.62                                          | 0     |
| <b><math>\text{MoCo}_x\text{O}_y\text{-50}</math></b>  | 1.96                            | 3.3                             | 0.66                                          | 0.21  |
| <b><math>\text{MoCo}_x\text{O}_y\text{-100}</math></b> | 0.45                            | 0.76                            | 1.48                                          | 0.48  |
| <b><math>\text{MoCo}_x\text{O}_y\text{-200}</math></b> | 1.33                            | 4.2                             | 0.56                                          | 0.29  |

**Table S3.** Comparison of OER activity of obtained catalyst.

| Catalyst                              | $\eta_{10}$<br>[mV] | Tafel Slope<br>[mV dec <sup>-1</sup> ] |
|---------------------------------------|---------------------|----------------------------------------|
| IrO <sub>2</sub>                      | 301                 | 66.7                                   |
| Co <sub>3</sub> O <sub>4</sub>        | 350                 | 95.7                                   |
| MoCo <sub>x</sub> O <sub>y</sub> -50  | 344                 | 71.2                                   |
| MoCo <sub>x</sub> O <sub>y</sub> -100 | 282                 | 60.6                                   |
| MoCo <sub>x</sub> O <sub>y</sub> -200 | 322                 | 64.2                                   |
| Co-Mo MOFs                            | 379                 | 109.5                                  |

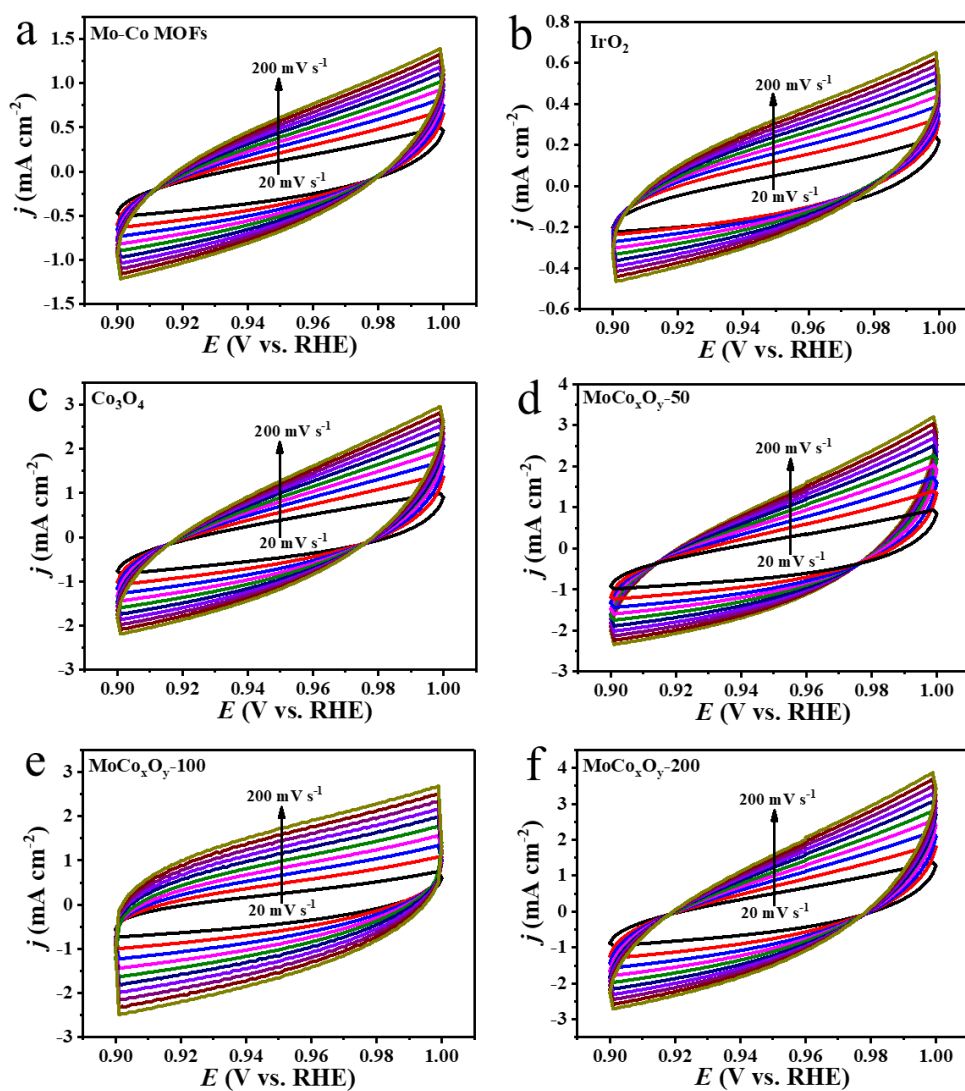

**Figure S16.** Cyclic voltammograms for a) Mo-Co MOFs; b) IrO<sub>2</sub>; c) Co<sub>3</sub>O<sub>4</sub> and d) MoCo<sub>x</sub>O<sub>y</sub>-50; e) MoCo<sub>x</sub>O<sub>y</sub>-100; f) MoCo<sub>x</sub>O<sub>y</sub>-200 in the non-faradaic region of 0.90-1.00 V vs. RHE at various scan rates.

**Table S4.**  $C_{dl}$  and ECSAs of various catalysts.

| Catalyst                              | $C_{dl}$ (mF cm <sup>-2</sup> ) | ECSA (cm <sup>2</sup> ) <sup>a</sup> |
|---------------------------------------|---------------------------------|--------------------------------------|
| IrO <sub>2</sub>                      | 1.03                            | 25.75                                |
| Co <sub>3</sub> O <sub>4</sub>        | 4.23                            | 105.75                               |
| MoCo <sub>x</sub> O <sub>y</sub> -50  | 4.84                            | 121.00                               |
| MoCo <sub>x</sub> O <sub>y</sub> -100 | 7.31                            | 182.75                               |
| MoCo <sub>x</sub> O <sub>y</sub> -200 | 5.24                            | 131.00                               |
| Co-Mo MOFs                            | 2.31                            | 57.75                                |

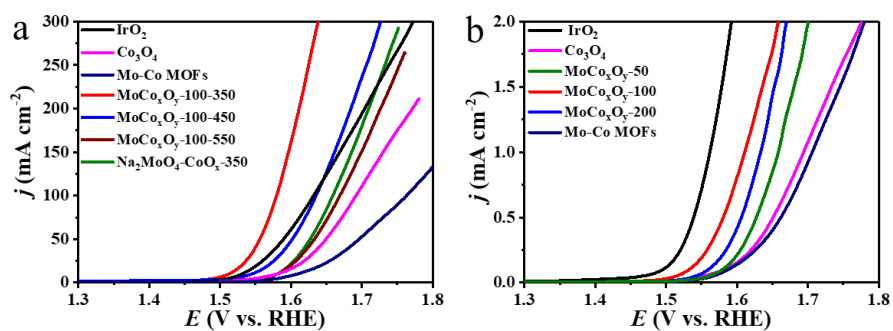**Figure S17.** a) OER polarization curves for MoCoO<sub>x</sub>-100 annealed at different temperatures and Na<sub>2</sub>MoO<sub>4</sub>-CoO<sub>x</sub>. b) ECSA-normalized OER polarization curves for Mo-Co MOFs, IrO<sub>2</sub>, Co<sub>3</sub>O<sub>4</sub>, MoCo<sub>x</sub>O<sub>y</sub>-50, MoCo<sub>x</sub>O<sub>y</sub>-100 and MoCo<sub>x</sub>O<sub>y</sub>-200 in 1.0 M KOH.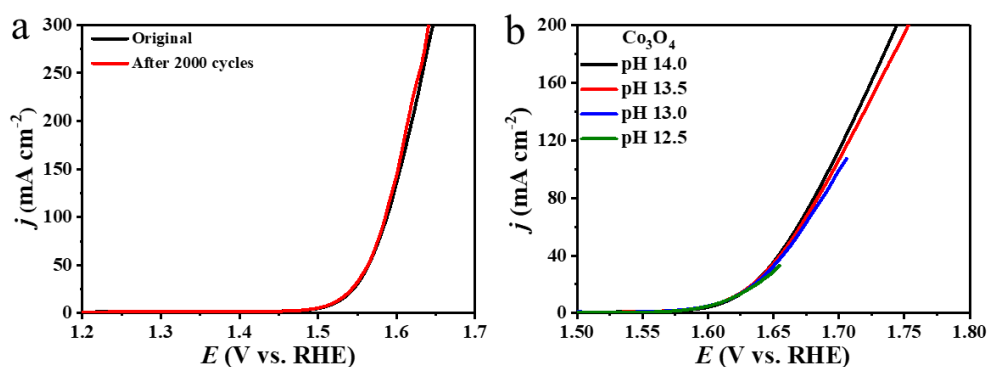**Figure S18.** OER polarization curves of a) MoCoO<sub>x</sub>-100 before and after 2000 cycles. b) Co<sub>3</sub>O<sub>4</sub> at different pH values.



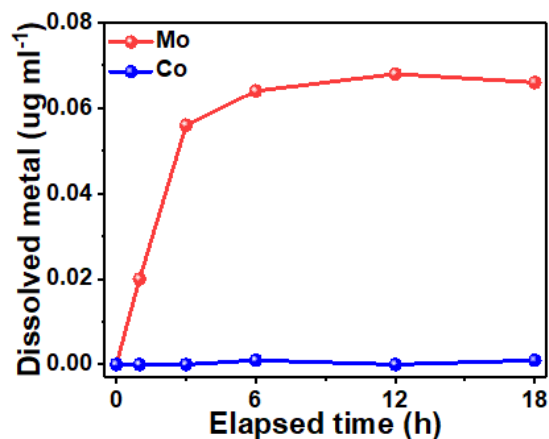

**Figure S19.** Time-dependent concentration of Mo and Co ions dissolved in the electrolyte during of MoCo<sub>x</sub>O<sub>y</sub>-100 a 18h chronoamperometric test at 282 mV vs. RHE

**Table S5.** Comparison of OER activity of amorphous MoCo<sub>x</sub>O<sub>y</sub>-100 nanosheets with recently reported Co-based electrocatalysts in alkaline electrolyte.

| Catalyst                                                         | Electrolyte      | Loading<br>[mg cm <sup>-2</sup> ] | η <sub>10</sub><br>[mV] | Tafel Slope<br>[mV dec <sup>-1</sup> ] | Referen<br>ces   |
|------------------------------------------------------------------|------------------|-----------------------------------|-------------------------|----------------------------------------|------------------|
| <b>MoCo<sub>x</sub>O<sub>y</sub>-100</b>                         | <b>1.0 M KOH</b> | <b>0.15</b>                       | <b>282</b>              | <b>60.4</b>                            | <b>This work</b> |
| <b>A-FeCoSeO<sub>x</sub>-100</b>                                 | 1.0 M KOH        | 0.27                              | 294                     | 45.1                                   | 2                |
| <b>Co<sub>3</sub>O<sub>4</sub>/CoMoO<sub>4</sub>-50</b>          | 1.0 M KOH        | 0.26                              | 318                     | 63                                     | 3                |
| <b>Co-LDH FNSAs</b>                                              | 1.0 M KOH        | /                                 | 300                     | 110                                    | 4                |
| <b>MoO<sub>2</sub>-Co<sub>2</sub>Mo<sub>3</sub>O<sub>8</sub></b> | 1.0 M KOH        | 0.20                              | 320                     | 88                                     | 5                |
| <b>CoVS NBs</b>                                                  | 1.0 M KOH        | 0.30                              | 290                     | 78.2                                   | 6                |
| <b>Co<sub>2</sub>Mo<sub>3</sub>O<sub>8</sub></b>                 | 1.0 M KOH        | 0.14                              | 290                     | 87.5                                   | [ <sup>7</sup> ] |
| <b>Co<sub>8</sub>Ag oxide</b>                                    | 1.0 M KOH        | 0.12                              | 344                     | 48                                     | 8                |
| <b>NiCoPO/NC</b>                                                 | 1.0 M KOH        | 0.21                              | 300                     | 94                                     | 9                |
| <b>Co<sub>3</sub>O<sub>4-x</sub> HOPNPs</b>                      | 0.1 M KOH        | /                                 | 280                     | 73.5                                   | 10               |
| <b>CoO-MoO<sub>2</sub></b>                                       | 1.0 M KOH        | 0.5                               | 312                     | 75                                     | 11               |
| <b>Co<sub>3</sub>O<sub>4</sub>/CoO-120s</b>                      | 1.0 M KOH        | /                                 | 302                     | 68.6                                   | 12               |
| <b>CoNiP-3DHFLMs</b>                                             | 1.0 M KOH        | 0.13                              | 292                     | 98                                     | 13               |
| <b>3D CoMoOS NBs</b>                                             | 1.0 M KOH        | /                                 | 281                     | 75.4                                   | 14               |
| <b>Co-CoO@NSC-5</b>                                              | 1.0 M KOH        | 0.25                              | 279                     | 83                                     | 15               |
| <b>Ni<sub>x</sub>Co<sub>3-x</sub>O<sub>4-y</sub></b>             | 1.0 M KOH        | 0.36                              | 320                     | 53                                     | 16               |

## REFERENCES

1. Z.-F. Huang, J. Song, Y. Du, S. Xi, S. Dou, J. M. V. Nsanzimana, C. Wang, Z. J. Xu and X. Wang, *Nat. Energy*, 2019, **4**, 329-338.
2. Q. Qian, Y. Li, Y. Liu and G. Zhang, *Appl. Catal. B*, 2020, **266**.
3. L. Zhang, T. Mi, M. A. Ziaee, L. Liang and R. Wang, *J. Mater. Chem. A*, 2018, **6**, 1639-1647.
4. T.-J. Wang, X. Liu, Y. Li, F. Li, Z. Deng and Y. Chen, *Nano Res.*, 2019, **13**, 79-85.
5. Y. Li, H. Xu, H. Huang, C. Wang, L. Gao and T. Ma, *Chem. Commun*, 2018, **54**, 2739-2742.
6. C. Wang, H. Xu, Y. Wang, H. Shang, L. Jin, F. Ren, T. Song, J. Guo and Y. Du, *Inorg. Chem*, 2020, **59**, 11814-11822.
7. T. Ouyang, X. T. Wang, X. Q. Mai, A. N. Chen, Z. Y. Tang and Z. Q. Liu, *Angew. Chem. Int. Ed.* 2020, **59**, 11948-11957.
8. M. Yu, G. H. Moon, R. G. Castillo, S. DeBeer, C. Weidenthaler and H. Tuysuz, *Angew. Chem. Int. Ed.* 2020, **59**, 16544-16552.
9. C. Wang, W. Chen, D. Yuan, S. Qian, D. Cai, J. Jiang and S. Zhang, *Nano Energy*, 2020, **69**.
10. D. Ji, L. Fan, L. Tao, Y. Sun, M. Li, G. Yang, T. Q. Tran, S. Ramakrishna and S. Guo, *Angew. Chem. Int. Ed.* 2019, **58**, 13840-13844.
11. F. Lyu, Y. Bai, Z. Li, W. Xu, Q. Wang, J. Mao, L. Wang, X. Zhang and Y. Yin, *Adv. Funct. Mater.* 2017, **27**.
12. Z. Liu, Z. Xiao, G. Luo, R. Chen, C. L. Dong, X. Chen, J. Cen, H. Yang, Y. Wang, D. Su, Y. Li and S. Wang, *Small*, 2019, **15**, e1904903.
13. G. Li, X. Zhang, H. Zhang, C. Liao and G. Jiang, *Appl. Catal. B*, 2019, **249**, 147-154.
14. H. Xu, H. Shang, C. Wang, L. Jin, C. Chen, C. Wang and Y. Du, *Appl. Catal. B*, 2020, **265**.
15. Y. Tan, Z. Zhang, Z. Lei, W. Wu, W. Zhu, N. Cheng and S. Mu, *J. Power Sources*, 2020, **473**.
16. R. P. Antony, A. K. Satpati, K. Bhattacharyya and B. N. Jagatap, *Adv. Mater. Interfaces*, 2016, **3**.
